# Supplementary material for: Whole Genome Expression Profiling of Semitendinosus Tendons from Children with Diplegic and Tetraplegic Cerebral Palsy
Source: MDPI journal article supplement (doi:10.3390/biomedicines11112918), 2023-10-28
Supplement: s1 [file s1]

**Table S1.** Oligos used for quantitative real-time PCR (qRT-PCR)

| <b>Primers</b> | <b>Sense</b>           | <b>Reverse</b>           |
|----------------|------------------------|--------------------------|
| <i>COL1A1</i>  | GCATGTCTGGTTCGGCGAGA   | ATGTTCTGGGAGGCCTCGGT     |
| <i>COL1A2</i>  | CCTAGCAACATGCCAATC     | GACCATCTTCACCATCTCT      |
| <i>P4HA3</i>   | ACTGTTCTATGAGACCAAT    | CACCACTGACCTCTGTAG       |
| <i>KERA</i>    | CGCACAATCAACTCACAA     | CATATTACAGAGACATTCACACT  |
| <i>SPARC</i>   | GCTGGATGAGAACAACAC     | AAGAAGTGGCAGGAAGAG       |
| <i>TNMD</i>    | AGACAAGCAAGTGAGGAA     | CGGCAGTAAATACAACAATAAC   |
| <i>MMP2</i>    | GCCAACTACAACCTTCTCC    | GCATCATCCACTGTCTCT       |
| <i>GJA1</i>    | CACTTGAAGCAGATTGAGATAA | CTTGAAGAGGATACTGATGATG   |
| <i>CXCL10</i>  | CATCAGCATTAGTAATCAACCT | ACATCTCTTCTCACCCTTC      |
| <i>TP63</i>    | CAGGAAGAGACAGGAAGG     | TGGTAAGTATAACAGTTCATCATC |
| <i>GAPDH</i>   | TGACAACAGCCTCAAGAT     | GTCCTTCCACGATACCAA       |
